# Supplementary material for: An essential role for dNTP homeostasis following CDK-induced replication stress
Source: Oxford University Press journal article supplement (doi:10.1242/jcs.226969), 2019-01-23
Supplement: jcs226969supp.pdf [file jcs226969supp.pdf]

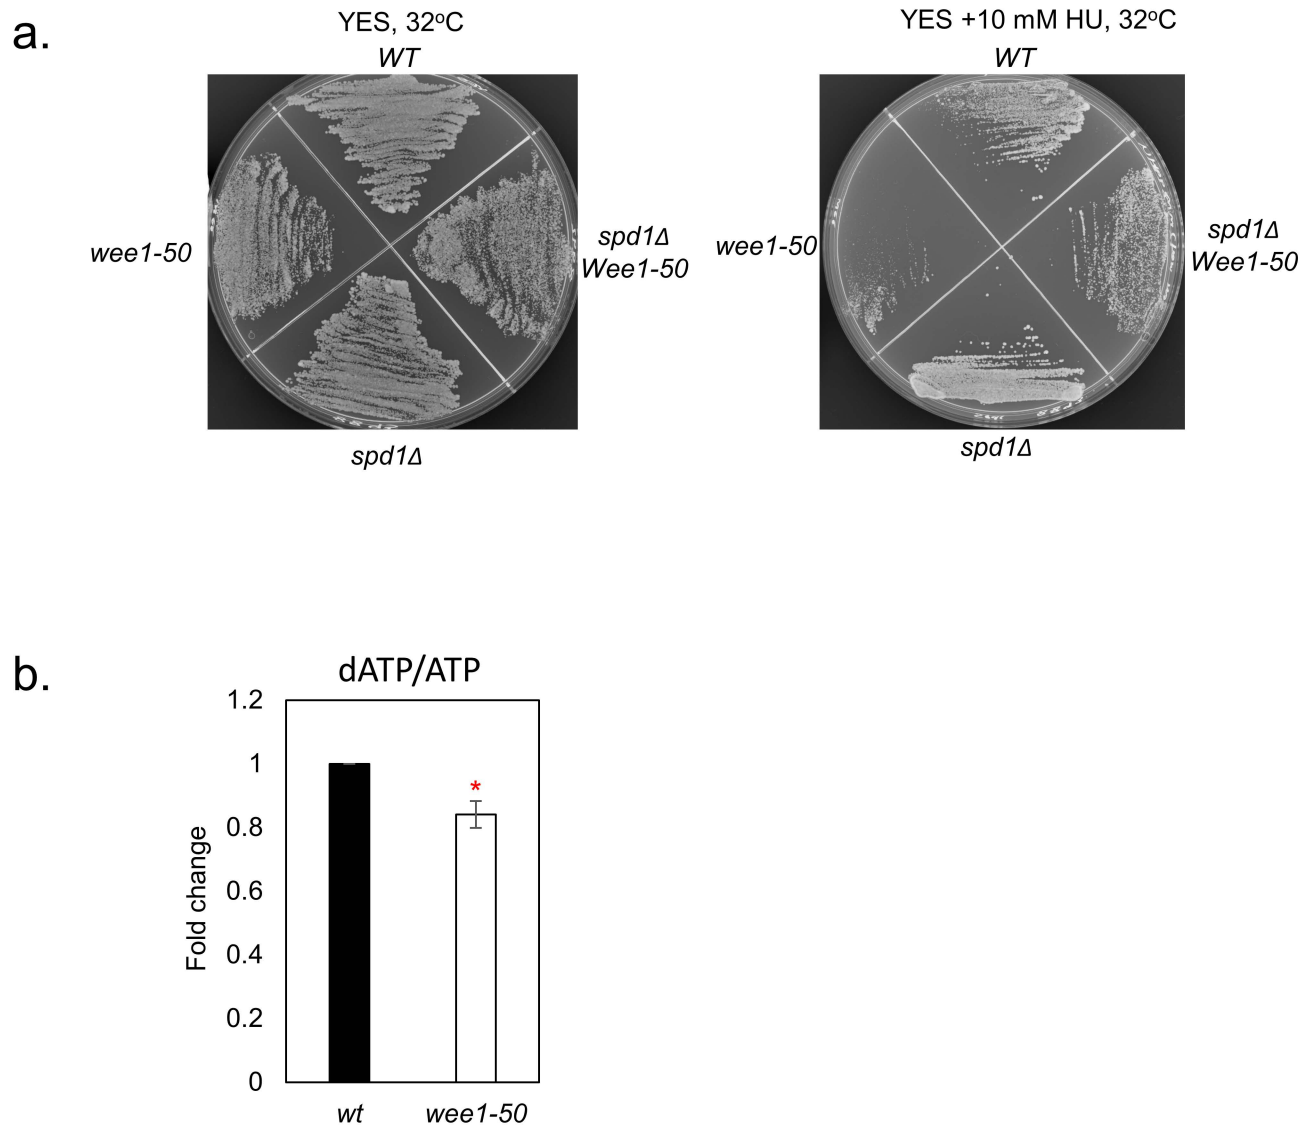

**Figure S1** *wee1-50* cells are sensitive to HU. (a) Equal amount of cells were streaked on YES or 10 mM HU and incubated at 32°C. (b) dATP levels in *wee1-50* cells were significantly lower than wild-type cells. dATP levels were normalised with ATP levels. The asterisk (\*) represents significant difference compared with wild type and *wee1-50* ( $p < 0.05$ , t test).

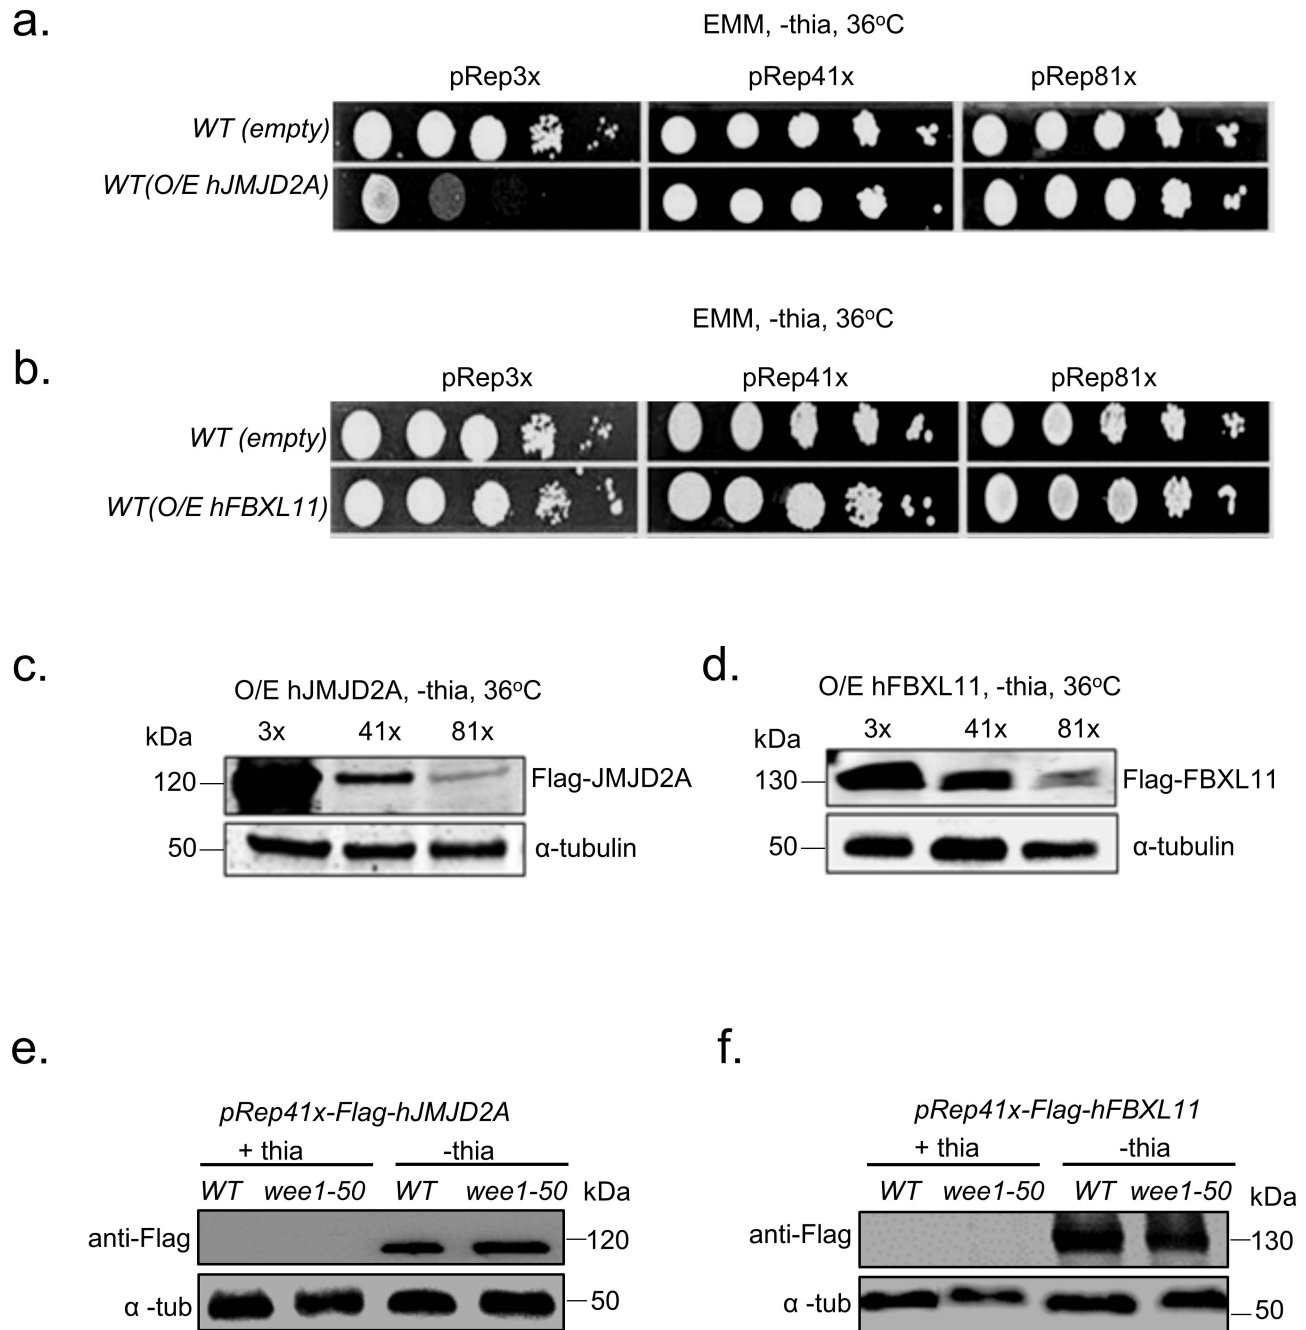

**Figure S2** Expression of different levels of human histone demethylase in *S. pombe*. (a) 10-fold serial dilutions of wild type expressing empty vector, hJMJD2A using three different *nmt* promoters were spotted onto EMM minus leucine without thiamine at 36°C. (b) 10-fold serial dilutions of wild type expressing empty vector, hFBXL11 using three different *nmt* promoters were spotted onto EMM minus leucine without thiamine at 36°C. (c) Western blot analysis of overexpression of FLAG-hJMJD2A levels in wild-type cells under the control of *pREP3X*, *pREP41X* and *pREP81X* plasmids. Anti-tubulin as a loading control. (d) Western blot analysis of overexpression of FLAG-hFBXL11 levels in wild-type cells under the control of *pREP3X*, *pREP41X* or *pREP81X* plasmid. Anti-tubulin is shown as a loading control. (e) Western blot analysis of hJMJD2A levels in wild-type or *wee1-50* cells containing *pREP41x-Flag-FBXL11* plasmids. α-tubulin is shown as a loading control. (f) Western blotting analysis of hFBXL11 levels in wild-type or *wee1-50* cells containing *pREP41x-Flag-FBXL11* plasmids. α-tubulin is shown as a loading control.

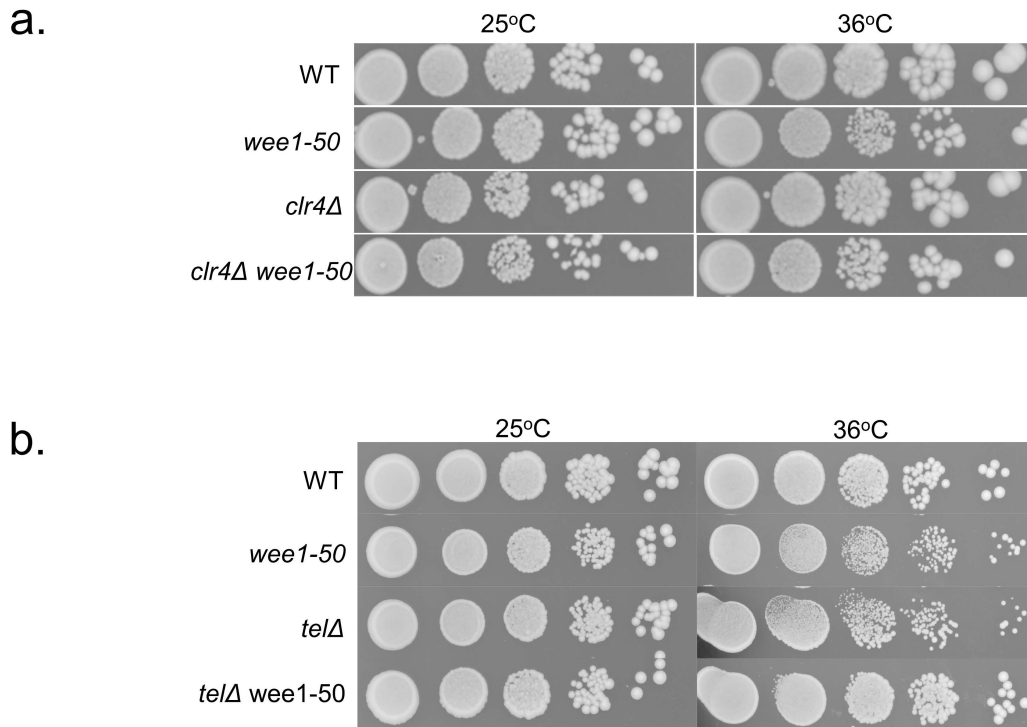

**Figure S3** Loss of Clr4 or Tel1 is not essential for the viability of *wee1-50* cells. (a) Serial dilution of a wild-type, *wee1-50*, *clr4Δ* and *clr4Δ wee1-50* strains were spotted onto YES medium and incubated at indicated temperatures for 2-3 days. (b) *tel1Δ* is not synthetic lethal with *wee1-50*. Serial dilution of a wild-type, *tel1Δ*, *wee1-50* and *tel1Δ wee1-50* strains were spotted onto YES medium and incubated at 25°C or 36°C for 2-3 days.

a.

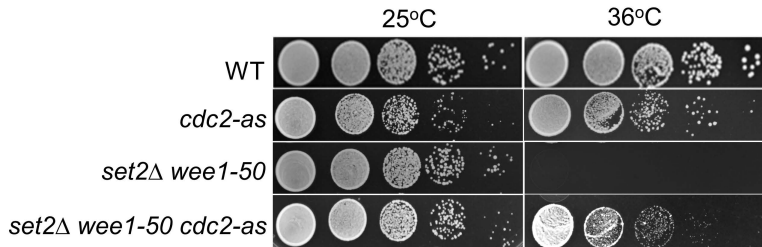

b.

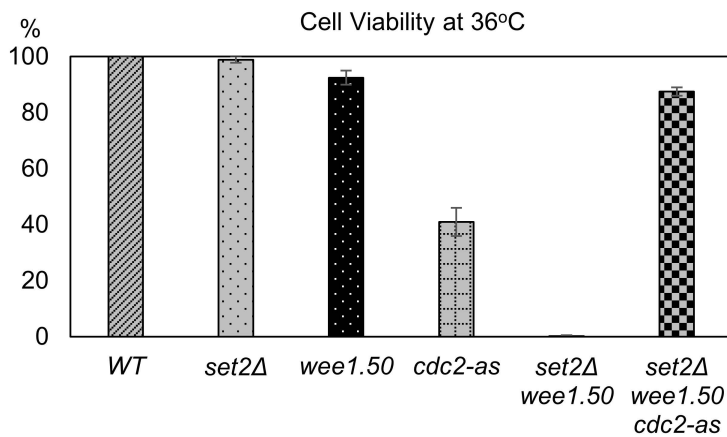

**Figure S4** Loss of Cdc2 function rescues the synthetic lethality of *set2Δ wee1-50* cells. (a) Serial dilution of a wild-type, *cdc2-as*, *set2Δ wee1-50* and *set2Δ wee1-50 cdc2-as* strains were spotted onto YES medium and incubated at indicated temperatures for 2-3 days. (b) Quantification of the cell viability of indicated strains at 36°C.

a.

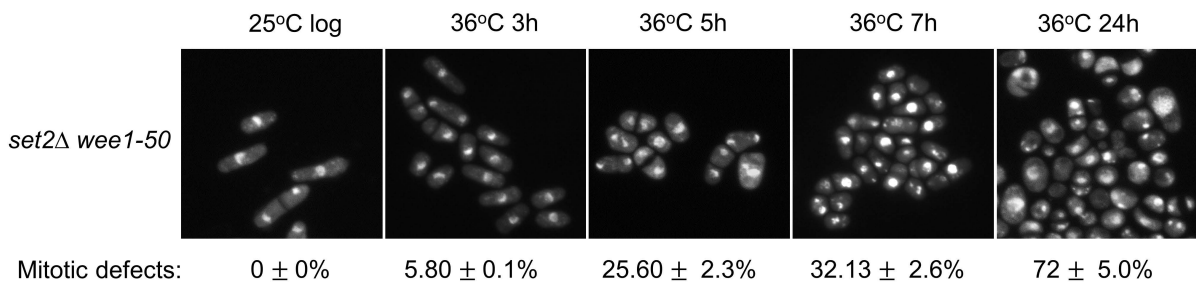

b.

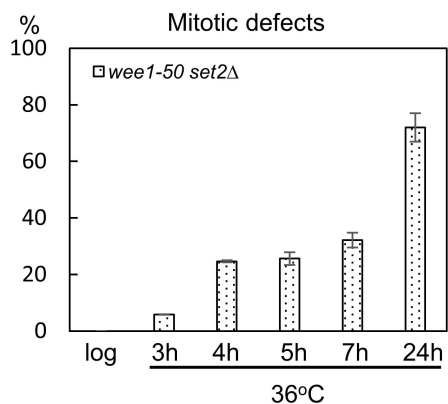

c.

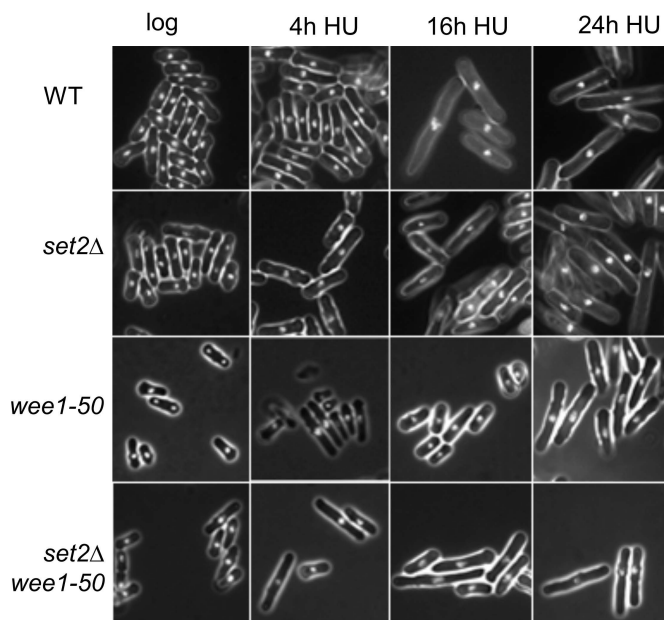

**Figure S5** *set2Δ wee1-50* cells exhibit severe mitotic catastrophe at later time points following Wee1 inactivation. (a) *set2Δ wee1-50* cells were grown to log phase at the permissive temperature then transferred to the restrictive temperature for 24h. Samples of cells were collected at indicated time points and stained with DAPI for microscopy analysis. (b) Quantification of mitotic defects in (a). (c) *set2Δ wee1-50* cells exhibit proficient checkpoint activation in response to HU. Cells were grown asynchronously in YES medium and transferred to YES in the presence of 10mM HU for 24h at 25°C. Samples were taken at the indicated time points and fixed with methanol/acetone; subsequently the fixed cells were examined by microscopy analysis.



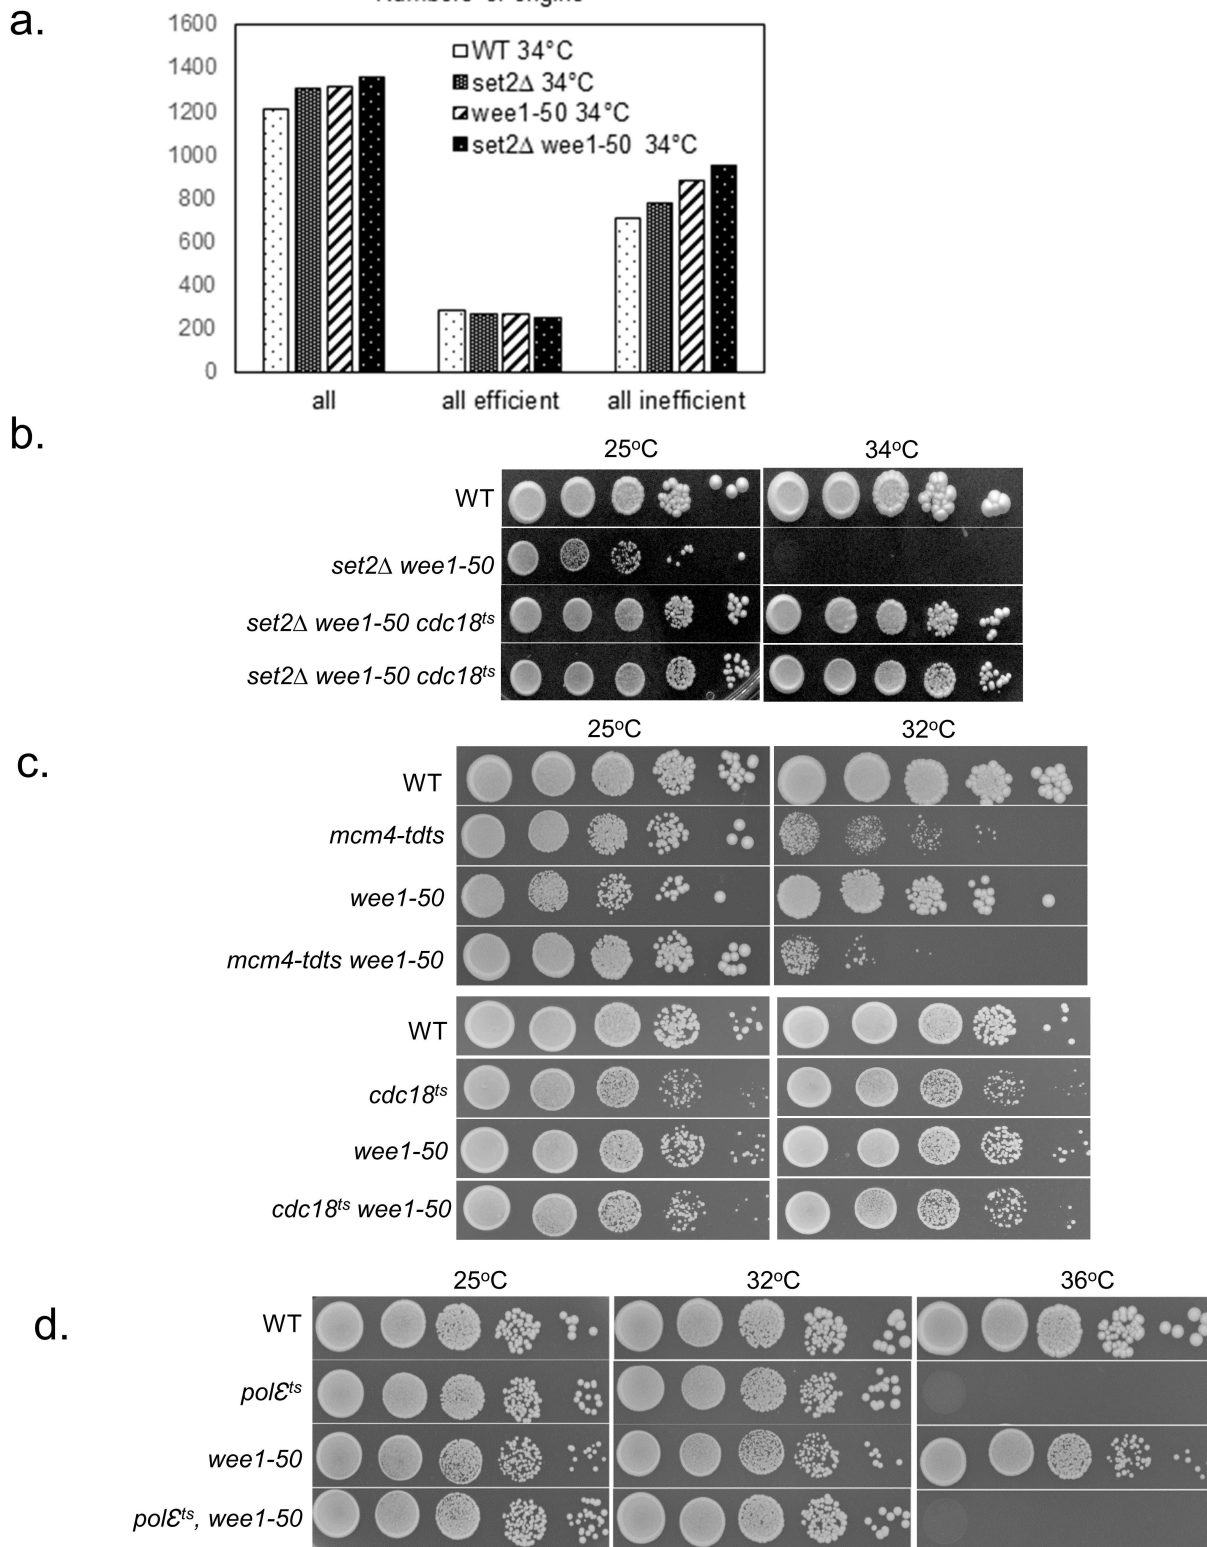

**Figure S6** Inhibition of origin firing suppresses the synthetic lethality of *set2Δ wee1-50* cells. (a) Set2 and Wee1 suppresses inefficient origin firing. The genome-wide plot of origin usage in vegetative wild-type, *set2Δ*, *wee1-50* or *set2Δ wee1-50* cells at 34°C. Origin efficiencies were calculated from Pu-seq data. (b) Inactivation of Cdc18 at the semi-restrictive temperature suppresses the synthetic lethality of *set2Δ wee1-50* cells (c) Inhibition of replication factors Cdc18 or Mcm4 does not cause severe viability loss with Wee1 inhibition in *S. pombe*. *cdc18<sup>ts</sup>* or *mcm4-tdts* is not synthetic lethal with *wee1-50*. (d) *polE<sup>ts</sup>* is not synthetic lethal with *wee1-50*.

a.

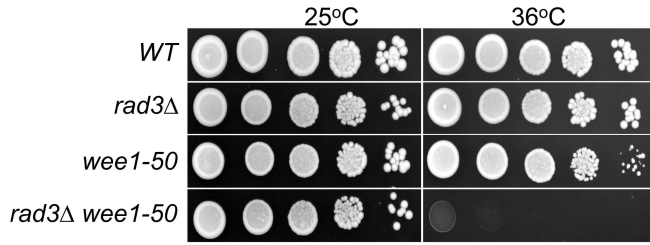

b.

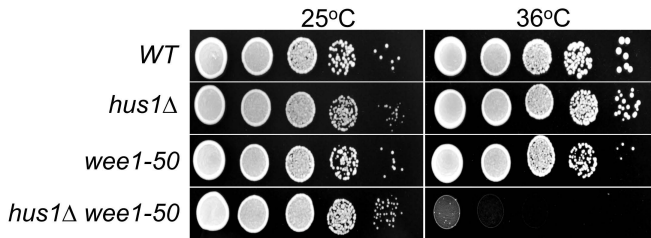

c.

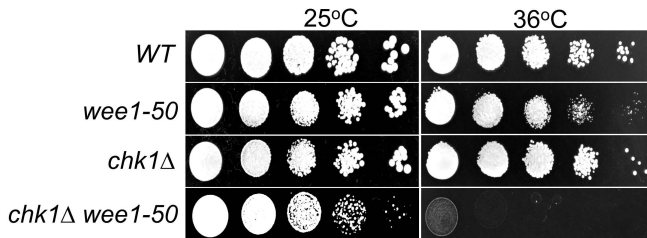

d.

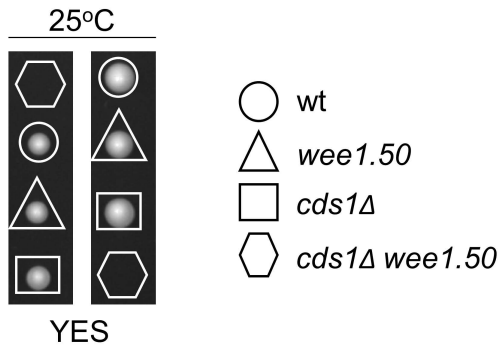

**Figure S7** Checkpoint mutant is synthetic lethal with *wee1-50* mutant. (a) *rad3Δ* is synthetic lethal with *wee1-50*. Serial dilution of a wild-type, *rad3Δ*, *wee1-50* and *rad3Δ wee1-50* strains were spotted onto YES medium and incubated at indicated temperatures for 2-3 days. (b) *hus1Δ* is synthetic lethal with *wee1-50*. Similar experiments were carried as described in (a). (c) *chk1Δ* is synthetic lethal with *wee1-50*. Similar experiments were carried as described in (a). (d) *cds1Δ* is synthetic lethal with *wee1-50* at 25°C.

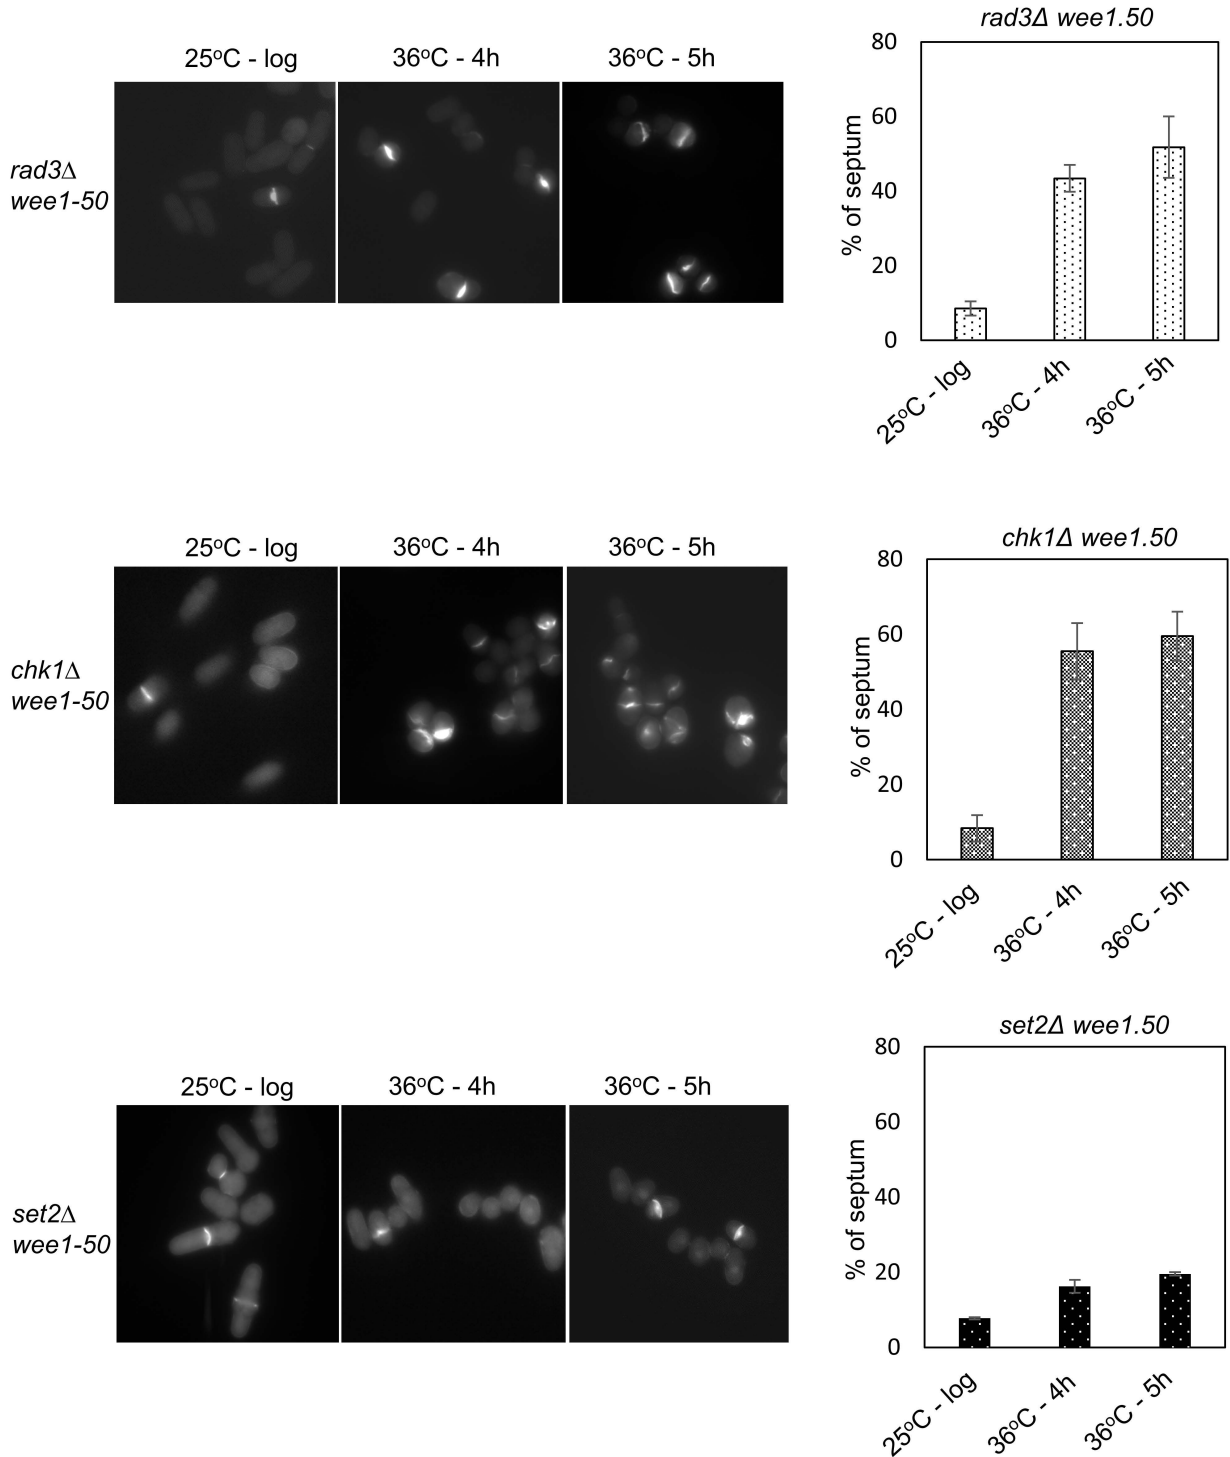

**Figure S8** Wee1 inhibition causes pre-mature entry into mitosis in checkpoint mutants. Percentage of septated cells flowing Wee1 inhibition in *rad3Δ*, *chk1Δ* or *set2Δ* cells.



**Table S1.** Strains used in this study

| Strain  | Genotype                                                                                       | Source            |
|---------|------------------------------------------------------------------------------------------------|-------------------|
| TH 344  | <i>wee1-50 h-</i>                                                                              | Lab stock         |
| TH 345  | <i>wee1-50 h+</i>                                                                              | Lab stock         |
| TH 350  | <i>ade6-M216 ura4-D18 leu1-32 h+</i>                                                           | Lab stock         |
| TH 358  | <i>wee1-50 leu1-32</i>                                                                         |                   |
| TH 805  | <i>Chr16 ade6 - M216 rad 21::mata::kanMx Chr3 ade6-M210</i>                                    | Lab stock         |
| TH 1142 | <i>mcm4(cdc21)-tdts::ura4+leu1-32 ura4-D18 h-</i>                                              | Stephen Kearsey   |
| TH 1501 | <i>tel1::ura4 ade6- his3D leu1-32, ura4-D18 h+</i>                                             | Lab stock         |
| TH 2094 | <i>arg3-D4, ade6-D1, ura4-D18, leu1-32, his3-D1 h-</i>                                         | Lab stock         |
| TH 2148 | <i>rad22::rad22-GFP::kanMx</i>                                                                 | Miguel G Ferreira |
| TH 3645 | <i>spd1::hygroR ura4-D18 leu1 ade6-704 h-</i>                                                  | Olaf Nielsen      |
| TH 3271 | <i>set2::ura4+ ade6-210 arg3-D4 his3-D1 leu1-32 ura4-D18 h-</i>                                | Robin Allshire    |
| TH 4027 | <i>leu1-32 ura4-D18 cdc2-as::HygR</i>                                                          | Lab stock         |
| TH 5512 | <i>yox1::kanMx arg3-D4, ade6-D1, ura4-D18, leu1-32, his3-D1 cycR</i>                           | Lab stock         |
| TH 6236 | <i>set2::kanMX ade6-210 leu1-32 ura4-D18 h-</i>                                                | Robin Allshire    |
| TH 6237 | <i>set2::kanMX ade6-210 leu1-32 ura4-D18 h+</i>                                                | Robin Allshire    |
| TH 6238 | <i>H3.1/H4.1::his3 H3.3/H4.3::arg3 ura4-DS/E ade6-M210 leu1-32 his3-D1 arg3-D4 h-</i>          | Robin Allshire    |
| TH 6241 | <i>H3.2K36R H3.1/H4.1::his3 H3.3/H4.3::arg3 ura4-DS/E ade6-M210 leu1-32 his3-D1 arg3-D4 h-</i> | Robin Allshire    |
| TH 6707 | <i>set2::ura4 cdc25-22</i>                                                                     | This study        |
| TH 6877 | <i>972 h-</i>                                                                                  | Lab stock         |
| TH 6960 | <i>cdc18-K46</i>                                                                               | Paul Nurse        |
| TH 7121 | <i>set2::kanMX wee1-50 ade6-D1 ura4-D18 leu1-32 his3-D1</i>                                    | This study        |
| TH 7133 | <i>set2::set2-R255G-ura4</i>                                                                   | Lab stock         |
| TH 7936 | <i>yox1::kanMx wee1-50</i>                                                                     | This study        |
| TH 7961 | <i>set2::set2-R255G-ura4 wee1-50</i>                                                           | This study        |
| TH 7972 | <i>wee1-50 spd1::hygroR arg3-D4, ura4-D18, leu1-32, his3-D1</i>                                | This study        |
| TH 8001 | <i>set2::kanMx mus81::kanMx wee1-50 ade6-210 ura4-D18</i>                                      | This study        |

|         |                                                                    |                  |
|---------|--------------------------------------------------------------------|------------------|
| TH 8064 | <i>set2::kanMx mus81::kanMx wee1ts</i>                             | This study       |
| TH 8073 | <i>set2::ura4 mus81::kanMx</i>                                     | This study       |
| TH 8261 | <i>mcm4-tdts-ura4+ wee1-50</i>                                     | This study       |
| TH 8306 | <i>cdc2-as-hygR wee1-50 set2::kanMx</i>                            | This study       |
| TH 8434 | <i>set2::kanMx yox1::kanMx wee1-50</i>                             | This study       |
| TH 8459 | <i>set2::kanMX spd1::HygroR</i>                                    | This study       |
| TH 8491 | <i>spd1::hygb set2::kanMx wee1-50</i>                              | This study       |
| TH 8492 | <i>spd1::hygb set2::kanMx wee1-50</i>                              | This study       |
| TH 8520 | <i>cdc18-K46 wee1-50</i>                                           | This study       |
| TH 8522 | <i>pole<sup>ts</sup> wee1-50</i>                                   | This study       |
| TH 8593 | <i>cdc22-CFP-kanMx set2::kanMx</i>                                 | This study       |
| TH 8653 | <i>set2::kanMx wee1-50 rad22-GFP-HYG</i>                           | This study       |
| TH 8663 | <i>wee1-50 cdc22-CFP-kanMx</i>                                     | This study       |
| TH 8673 | <i>wee1-50 set2::kanMx cdc22-cfp-kanMx</i>                         | This study       |
| TH 8701 | <i>wee1-50 rad22-GFP::HygR</i>                                     | This study       |
| TH 8702 | <i>set2::kanR rad22-GFP::HygR</i>                                  | This study       |
| TH 8726 | <i>set2::kanMX cdc22-D57N</i>                                      | This study       |
| TH 8727 | <i>cdc22-CFP:: kanMX</i>                                           | Stephen Kearsley |
| TH 8729 | <i>set2:: kanMX cdc22-CFP:: kanMX</i>                              | This study       |
| TH 8930 | <i>arg3-D4, ade6-D1, ura4-D18, leu1-32, his3-D1 pREP3X</i>         | This study       |
| TH 8931 | <i>ade6-M216 ura4-D18 leu1-32 pREP41X</i>                          | This study       |
| TH 8932 | <i>ade6-M216 ura4-D18 leu1-32 pREP81X</i>                          | This study       |
| TH 8933 | <i>arg3-D4, ade6-D1, ura4-D18, leu1-32, his3-D1 pREP3X-JMJD2A</i>  | This study       |
| TH 8934 | <i>arg3-D4, ade6-D1, ura4-D18, leu1-32, his3-D1 pREP41X-JMJD2A</i> | This study       |
| TH 8935 | <i>arg3-D4, ade6-D1, ura4-D18, leu1-32, his3-D1 pREP81X-JMJD2A</i> | This study       |
| TH 8940 | <i>arg3-D4, ade6-D1, ura4-D18, leu1-32, his3-D1 pREP41X-FBXL11</i> | This study       |
| TH 8941 | <i>arg3-D4, ade6-D1, ura4-D18, leu1-32, his3-D1 pREP81X-FBXL11</i> | This study       |
| TH 8956 | <i>wee1-50 leu1-32 pREP41X</i>                                     | This study       |

|         |                                                                                  |            |
|---------|----------------------------------------------------------------------------------|------------|
| TH 8957 | <i>wee1-50 leu1-32 pREP81X</i>                                                   | This study |
| TH 8959 | <i>wee1-50 leu1-32 pREP41X-JMJD2A</i>                                            | This study |
| TH 8960 | <i>wee1-50 leu1-32 pREP41X-JMJD2A</i>                                            | This study |
| TH 8965 | <i>wee1-50 leu1-32 pREP41X- FBXL11</i>                                           | This study |
| TH 8966 | <i>wee1-50 leu1-32 pREP41X- FBXL11</i>                                           | This study |
| TH 8990 | <i>wee1-50 rad3::kanMx</i>                                                       | This study |
| TH 8991 | <i>wee1-50 chk1::ura4</i>                                                        | This study |
| TH 8993 | <i>mus81::kanMx wee1-50 rad22-GFP-hygb</i>                                       | This study |
| TH 8994 | <i>spd1::hygb chk1::ura4 wee1-50</i>                                             | This study |
| TH 8995 | <i>spd1::hygb chk1::ura4 wee1-50</i>                                             | This study |
| TH 8996 | <i>nrm1::HYG set2::kanMx wee1-50</i>                                             | This study |
| TH 8997 | <i>nrm1::HYG set2::kanMx wee1-50</i>                                             | This study |
| TH 8998 | <i>wee1-50 ade6-M210 Chr16 ade6 - M216 rad 21::mata-kanMx</i>                    | This study |
| TH 8999 | <i>clr4::kanMx wee1-50</i>                                                       | This study |
| TH 9000 | <i>hus1::leu+ wee1-50</i>                                                        | This study |
| TH 9001 | <i>tel1::ura4 wee1-50 ura4-D18</i>                                               | This study |
| TH 9002 | <i>rad3::kanMx wee1-50 spd1::HYG</i>                                             | This study |
| TH 9003 | <i>cdc18-K46 set2::kanMx wee1-50</i>                                             | This study |
| TH 9004 | <i>cdc18-K46 set2::kanMx wee1-50</i>                                             | This study |
| IM 655  | <i>rnh201::KanMX cdc20-M603F::lox ade6-704 leu1-32 ura4-D18 h-</i>               | Tony Carr  |
| IM 856  | <i>rnh201::KanMX cdc6-L591G::lox ade6-704 leu1-32 ura4-D18 h-</i>                | Tony Carr  |
| YAK250  | <i>set2::kanMx rnh201::HYG, cdc20-M603F ade6-704 leu1-32 ura4-D18 h-</i>         | Tony Carr  |
| YAK251  | <i>set2::kanMx rnh201::HYG, cdc6-L591G ade6-704 leu1-32 ura4-D18</i>             | Tony Carr  |
| YAK313  | <i>set2::kanMx wee1-50 rnh201::HYG, cdc20-M603F ade6-704 leu1-32 ura4-D18 h-</i> | Tony Carr  |
| YAK315  | <i>set2::kanMx wee1-50 rnh201::HYG, cdc20-M603F ade6-704 leu1-32 ura4-D18 h-</i> | Tony Carr  |
